# Supplementary material
Source: PubMed Central journal article supplement (PMC2639353)
Supplement: msn208_2.pdf [file msn208_2.pdf]

**Supplementary Table 2.** Population genetic parameters for 4 putatively neutral nuclear loci unlinked to *Brevinin1.1* (1246 bp) in 3 frog species (*Arcadlin*, *Myosin*, *FIBI7*, and *Tyrosinase*). Population sites are numbered as in Figure 1. For all statistical tests, \* =  $p < 0.05$  and \*\* =  $p < 0.01$ .

| Site | Species           | 2N <sup>a</sup> | Locus             | Length <sup>b</sup> | HW <sup>c</sup> | S <sup>d</sup> | H <sup>e</sup> | Hd <sup>f</sup> | $\pi$ <sup>g</sup> | $\pi_s$ <sup>h</sup> | ZnS <sup>i</sup> | $\pi_n/\pi_s$ <sup>j</sup> | Tajima's D <sup>k</sup> |
|------|-------------------|-----------------|-------------------|---------------------|-----------------|----------------|----------------|-----------------|--------------------|----------------------|------------------|----------------------------|-------------------------|
| 1    | <i>R. pipiens</i> | 74              | <i>Arcadlin</i>   | 265                 | y               | 4              | 6              | 0.69            | 0.005              | 0.011                | 0.24             | 0.05**                     | 1.60                    |
|      |                   |                 | <i>Myosin</i>     | 150                 | y               | 6              | 6              | 0.61            | 0.011              | 0.016                | 0.22             | 0.00*                      | 0.69                    |
|      |                   |                 | <i>FIBI7</i>      | 258                 | y               | 10             | 5              | 0.33            | 0.004              | 0.005                | 0.30             | 0.00                       | -1.28                   |
|      |                   |                 | <i>Tyrosinase</i> | 573                 | y               | 9              | 8              | 0.78            | 0.005              | 0.017                | 0.21             | 0.07**                     | 1.11                    |
|      |                   |                 | Mean $\pm$        | 312 $\pm$           | y               | 7.3 $\pm$      | 6.3 $\pm$      | 0.60 $\pm$      | 0.005 $\pm$        | 0.012 $\pm$          | 0.24 $\pm$       | 0.03**                     | 0.53 $\pm$              |
|      |                   |                 | St. Dev.          | 182                 |                 | 2.8            | 1.3            | 0.19            | 0.003              | 0.006                | 0.04             | -                          | 1.26                    |
| 2    | <i>R. pipiens</i> | 44              | <i>Arcadlin</i>   | 265                 | y               | 4              | 5              | 0.68            | 0.005              | 0.009                | 0.19             | 0.04**                     | 0.80                    |
|      |                   |                 | <i>Myosin</i>     | 150                 | y               | 6              | 5              | 0.67            | 0.012              | 0.019                | 0.23             | 0.05*                      | 0.84                    |
|      |                   |                 | <i>FIBI7</i>      | 258                 | y               | 4              | 3              | 0.32            | 0.004              | 0.005                | 0.61*            | 0.00                       | 0.21                    |
|      |                   |                 | <i>Tyrosinase</i> | 573                 | y               | 9              | 7              | 0.73            | 0.004              | 0.013                | 0.21             | 0.00**                     | 0.32                    |

|    |                     |    |                   |           |   |           |           |            |             |             |            |        |             |
|----|---------------------|----|-------------------|-----------|---|-----------|-----------|------------|-------------|-------------|------------|--------|-------------|
|    |                     |    | Mean $\pm$        | 312 $\pm$ | y | 5.8 $\pm$ | 5.0 $\pm$ | 0.60 $\pm$ | 0.005 $\pm$ | 0.011 $\pm$ | 0.31 $\pm$ | 0.04** | 0.54 $\pm$  |
|    |                     |    | St. Dev.          | 182       |   | 2.4       | 1.6       | 0.19       | 0.004       | 0.006       | 0.20       | -      | 0.32        |
| 14 | <i>R. blairi</i>    | 54 | <i>Arcadlin</i>   | 265       | y | 2         | 3         | 0.50       | 0.002       | 0.004       | 0.03       | 0.00*  | 0.33        |
|    |                     |    | <i>Myosin</i>     | 150       | y | 2         | 3         | 0.46       | 0.003       | 0.005       | 0.03       | 0.00   | 0.25        |
|    |                     |    | <i>FIBI7</i>      | 258       | y | 1         | 2         | 0.04       | 0.000       | 0.000       | -          | 0.00   | -1.10       |
|    |                     |    | <i>Tyrosinase</i> | 573       | y | 2         | 3         | 0.51       | 0.001       | 0.000       | 0.01       | >4.1   | 0.33        |
|    |                     |    | Mean $\pm$        | 312 $\pm$ | y | 1.8 $\pm$ | 2.8 $\pm$ | 0.38 $\pm$ | 0.001 $\pm$ | 0.002 $\pm$ | 0.02 $\pm$ | 0.13   | -0.05 $\pm$ |
|    |                     |    | St. Dev.          | 182       |   | 0.5       | 0.5       | 0.23       | 0.001       | 0.003       | 0.01       | -      | 0.70        |
| 15 | <i>R. blairi</i>    | 46 | <i>Arcadlin</i>   | 265       | y | 1         | 2         | 0.41       | 0.002       | 0.003       | -          | 0.00   | 1.13        |
|    |                     |    | <i>Myosin</i>     | 150       | y | 2         | 3         | 0.55       | 0.004       | 0.006       | 0.05       | 0.00   | 0.64        |
|    |                     |    | <i>FIBI7</i>      | 258       | y | 2         | 3         | 0.17       | 0.001       | 0.001       | 0.00       | 0.00   | -1.15       |
|    |                     |    | <i>Tyrosinase</i> | 573       | y | 3         | 4         | 0.54       | 0.001       | 0.000       | 0.05       | >4.4   | -0.08       |
|    |                     |    | Mean $\pm$        | 312 $\pm$ | y | 2 $\pm$   | 3.0 $\pm$ | 0.42 $\pm$ | 0.001 $\pm$ | 0.003 $\pm$ | 0.03 $\pm$ | 0.14   | 0.13 $\pm$  |
|    |                     |    | St. Dev.          | 182       |   | 0.8       | 0.8       | 0.18       | 0.002       | 0.003       | 0.03       | -      | 0.99        |
| 16 | <i>R. palustris</i> | 40 | <i>Arcadlin</i>   | 265       | y | 4         | 4         | 0.67       | 0.006       | 0.012       | 0.32       | 0.00** | 1.55        |

|    |                     |    |                   |           |   |           |           |            |             |             |            |        |            |
|----|---------------------|----|-------------------|-----------|---|-----------|-----------|------------|-------------|-------------|------------|--------|------------|
|    |                     |    | <i>Myosin</i>     | 150       | y | 4         | 2*        | 0.51       | 0.014*      | 0.016*      | 1.00*      | 0.64   | 2.77**     |
|    |                     |    | <i>FIBI7</i>      | 258       | y | 13        | 6         | 0.53*      | 0.015       | 0.017       | 0.36       | 0.00*  | 0.71       |
|    |                     |    | <i>Tyrosinase</i> | 573       | y | 5         | 3         | 0.57       | 0.002       | 0.007       | 0.66*      | 0.12** | 0.14       |
|    |                     |    | Mean $\pm$        | 312 $\pm$ | y | 6.5 $\pm$ | 3.8 $\pm$ | 0.57 $\pm$ | 0.007 $\pm$ | 0.013 $\pm$ | 0.58 $\pm$ | 0.21** | 1.29 $\pm$ |
|    |                     |    | St. Dev.          | 182       |   | 4.4       | 1.7*      | 0.07       | 0.006       | 0.005       | 0.32*      | -      | 1.14**     |
| 17 | <i>R. palustris</i> | 46 | <i>Arcadlin</i>   | 265       | y | 1         | 2         | 0.20       | 0.001       | 0.002       | -          | 0.00   | -0.18      |
|    |                     |    | <i>Myosin</i>     | 150       | y | 0         | 0         | 0.00       | 0.000       | 0.000       | -          | 0.00   | -          |
|    |                     |    | <i>FIBI7</i>      | 258       | y | 13        | 3**       | 0.48*      | 0.018*      | 0.021*      | 0.56*      | 0.00*  | 1.62       |
|    |                     |    | <i>Tyrosinase</i> | 573       | y | 7         | 4         | 0.67       | 0.003       | 0.010       | 0.54*      | 0.08** | -0.04      |
|    |                     |    | Mean $\pm$        | 312 $\pm$ | y | 5.3 $\pm$ | 2.3 $\pm$ | 0.34 $\pm$ | 0.005 $\pm$ | 0.008 $\pm$ | 0.55 $\pm$ | 0.02** | 0.47 $\pm$ |
|    |                     |    | St. Dev.          | 182       |   | 6.0       | 1.7**     | 0.30       | 0.008       | 0.010       | 0.02*      | -      | 1.00       |

<sup>a</sup>2N = number of alleles = twice the number of individuals

<sup>b</sup>Length = locus length in base pairs

<sup>c</sup>HW = in Hardy-Weinberg equilibrium; y = yes

<sup>d</sup>S = total number of segregating sites among the 4 loci

<sup>e</sup>h = mean number of haplotypes per locus; tested whether h is significantly low given S

<sup>f</sup>Hd = mean haplotype diversity per locus, equivalent to expected heterozygosity; tested whether Hd is significantly low given S

<sup>g</sup> $\pi$  = mean number of pairwise differences among sequences; tested whether  $\pi$  is significantly extreme given S

<sup>h</sup> $\pi_s$  = mean number of pairwise differences among sequences at silent sites; tested whether  $\pi_s$  is significantly extreme given silent S

<sup>i</sup>ZnS = mean linkage disequilibrium statistic of Kelly (1997) per locus; tested whether ZnS is significantly high given S

<sup>j</sup> $\pi_n/\pi_s$  = ratio of nonsynonymous nucleotide variation to synonymous nucleotide variation; tested whether significantly different than 1

<sup>k</sup>Tajima's D = statistic of Tajima (1989); tested whether significantly different than 0.
